# Supplementary material for: Comparative analysis of the circadian rhythm genes period and timeless in Culex pipiens Linnaeus, 1758 (Diptera, Culicidae)
Source: Comp Cytogenet. 2016 Oct 10;10(4):483–504. doi: 10.3897/CompCytogen.v10i4.7582 (PMC5240504; doi:10.3897/CompCytogen.v10i4.7582)
Supplement: Supplementary material 7 — Codon-based Test of of Purifying Selection for analysis between the exon1 of the gene tim sequences of Culex pipiens both forms. [file CompCytogen-010-483-s007.xls]

## Sheet: MatrixOutput
molestus1-1_{molestus}		0	0	0	0.996654	0	0.996654	0.996654	0.996654	0	0	0.996654	0	0	0.996654	0	0	0	0	0	0	2.06143	2.06143	2.06143	2.06143	0.707724	0.707724	0	0	0	0.996654	0.996654	0.996654	0	0	0	0	0	0.996654	0.996654	0.996654	0	0	0	0	0.996654	0	0
molestus1-2_{molestus}	1		0	0	0.996654	0	0.996654	0.996654	0.996654	0	0	0.996654	0	0	0.996654	0	0	0	0	0	0	2.06143	2.06143	2.06143	2.06143	0.707724	0.707724	0	0	0	0.996654	0.996654	0.996654	0	0	0	0	0	0.996654	0.996654	0.996654	0	0	0	0	0.996654	0	0
molestus1-3_{molestus}	1	1		0	0.996654	0	0.996654	0.996654	0.996654	0	0	0.996654	0	0	0.996654	0	0	0	0	0	0	2.06143	2.06143	2.06143	2.06143	0.707724	0.707724	0	0	0	0.996654	0.996654	0.996654	0	0	0	0	0	0.996654	0.996654	0.996654	0	0	0	0	0.996654	0	0
molestus2-1_{molestus}	1	1	1		0.996654	0	0.996654	0.996654	0.996654	0	0	0.996654	0	0	0.996654	0	0	0	0	0	0	2.06143	2.06143	2.06143	2.06143	0.707724	0.707724	0	0	0	0.996654	0.996654	0.996654	0	0	0	0	0	0.996654	0.996654	0.996654	0	0	0	0	0.996654	0	0
molestus2-2_{molestus}	0.160469	0.160469	0.160469	0.160469		0.996654	0	0	0	0.996654	0.996654	0	0.996654	0.996654	0	0.996654	0.996654	0.996654	0.996654	0.996654	0.996654	1.84186	1.84186	1.84186	1.84186	1.04771	1.04771	0.996654	0.996654	0.996654	0	0	0	0.996654	0.996654	0.996654	0.996654	0.996654	0	0	0	0.996654	0.996654	0.996654	0.996654	0	0.996654	0.996654
molestus2-3_{molestus}	1	1	1	1	0.160469		0.996654	0.996654	0.996654	0	0	0.996654	0	0	0.996654	0	0	0	0	0	0	2.06143	2.06143	2.06143	2.06143	0.707724	0.707724	0	0	0	0.996654	0.996654	0.996654	0	0	0	0	0	0.996654	0.996654	0.996654	0	0	0	0	0.996654	0	0
molestus3-1_{molestus}	0.160469	0.160469	0.160469	0.160469	1	0.160469		0	0	0.996654	0.996654	0	0.996654	0.996654	0	0.996654	0.996654	0.996654	0.996654	0.996654	0.996654	1.84186	1.84186	1.84186	1.84186	1.04771	1.04771	0.996654	0.996654	0.996654	0	0	0	0.996654	0.996654	0.996654	0.996654	0.996654	0	0	0	0.996654	0.996654	0.996654	0.996654	0	0.996654	0.996654
molestus3-2_{molestus}	0.160469	0.160469	0.160469	0.160469	1	0.160469	1		0	0.996654	0.996654	0	0.996654	0.996654	0	0.996654	0.996654	0.996654	0.996654	0.996654	0.996654	1.84186	1.84186	1.84186	1.84186	1.04771	1.04771	0.996654	0.996654	0.996654	0	0	0	0.996654	0.996654	0.996654	0.996654	0.996654	0	0	0	0.996654	0.996654	0.996654	0.996654	0	0.996654	0.996654
molestus3-3_{molestus}	0.160469	0.160469	0.160469	0.160469	1	0.160469	1	1		0.996654	0.996654	0	0.996654	0.996654	0	0.996654	0.996654	0.996654	0.996654	0.996654	0.996654	1.84186	1.84186	1.84186	1.84186	1.04771	1.04771	0.996654	0.996654	0.996654	0	0	0	0.996654	0.996654	0.996654	0.996654	0.996654	0	0	0	0.996654	0.996654	0.996654	0.996654	0	0.996654	0.996654
mV16_{molestus}	1	1	1	1	0.160469	1	0.160469	0.160469	0.160469		0	0.996654	0	0	0.996654	0	0	0	0	0	0	2.06143	2.06143	2.06143	2.06143	0.707724	0.707724	0	0	0	0.996654	0.996654	0.996654	0	0	0	0	0	0.996654	0.996654	0.996654	0	0	0	0	0.996654	0	0
mV17_{molestus}	1	1	1	1	0.160469	1	0.160469	0.160469	0.160469	1		0.996654	0	0	0.996654	0	0	0	0	0	0	2.06143	2.06143	2.06143	2.06143	0.707724	0.707724	0	0	0	0.996654	0.996654	0.996654	0	0	0	0	0	0.996654	0.996654	0.996654	0	0	0	0	0.996654	0	0
mV18_{molestus}	0.160469	0.160469	0.160469	0.160469	1	0.160469	1	1	1	0.160469	0.160469		0.996654	0.996654	0	0.996654	0.996654	0.996654	0.996654	0.996654	0.996654	1.84186	1.84186	1.84186	1.84186	1.04771	1.04771	0.996654	0.996654	0.996654	0	0	0	0.996654	0.996654	0.996654	0.996654	0.996654	0	0	0	0.996654	0.996654	0.996654	0.996654	0	0.996654	0.996654
mV279_{molestus}	1	1	1	1	0.160469	1	0.160469	0.160469	0.160469	1	1	0.160469		0	0.996654	0	0	0	0	0	0	2.06143	2.06143	2.06143	2.06143	0.707724	0.707724	0	0	0	0.996654	0.996654	0.996654	0	0	0	0	0	0.996654	0.996654	0.996654	0	0	0	0	0.996654	0	0
mV168_{molestus}	1	1	1	1	0.160469	1	0.160469	0.160469	0.160469	1	1	0.160469	1		0.996654	0	0	0	0	0	0	2.06143	2.06143	2.06143	2.06143	0.707724	0.707724	0	0	0	0.996654	0.996654	0.996654	0	0	0	0	0	0.996654	0.996654	0.996654	0	0	0	0	0.996654	0	0
mV48_{molestus}	0.160469	0.160469	0.160469	0.160469	1	0.160469	1	1	1	0.160469	0.160469	1	0.160469	0.160469		0.996654	0.996654	0.996654	0.996654	0.996654	0.996654	1.84186	1.84186	1.84186	1.84186	1.04771	1.04771	0.996654	0.996654	0.996654	0	0	0	0.996654	0.996654	0.996654	0.996654	0.996654	0	0	0	0.996654	0.996654	0.996654	0.996654	0	0.996654	0.996654
mV49_{molestus}	1	1	1	1	0.160469	1	0.160469	0.160469	0.160469	1	1	0.160469	1	1	0.160469		0	0	0	0	0	2.06143	2.06143	2.06143	2.06143	0.707724	0.707724	0	0	0	0.996654	0.996654	0.996654	0	0	0	0	0	0.996654	0.996654	0.996654	0	0	0	0	0.996654	0	0
mNev5_{molestus}	1	1	1	1	0.160469	1	0.160469	0.160469	0.160469	1	1	0.160469	1	1	0.160469	1		0	0	0	0	2.06143	2.06143	2.06143	2.06143	0.707724	0.707724	0	0	0	0.996654	0.996654	0.996654	0	0	0	0	0	0.996654	0.996654	0.996654	0	0	0	0	0.996654	0	0
mM20_{molestus}	1	1	1	1	0.160469	1	0.160469	0.160469	0.160469	1	1	0.160469	1	1	0.160469	1	1		0	0	0	2.06143	2.06143	2.06143	2.06143	0.707724	0.707724	0	0	0	0.996654	0.996654	0.996654	0	0	0	0	0	0.996654	0.996654	0.996654	0	0	0	0	0.996654	0	0
mNN22_{molestus}	1	1	1	1	0.160469	1	0.160469	0.160469	0.160469	1	1	0.160469	1	1	0.160469	1	1	1		0	0	2.06143	2.06143	2.06143	2.06143	0.707724	0.707724	0	0	0	0.996654	0.996654	0.996654	0	0	0	0	0	0.996654	0.996654	0.996654	0	0	0	0	0.996654	0	0
mNN19_{molestus}	1	1	1	1	0.160469	1	0.160469	0.160469	0.160469	1	1	0.160469	1	1	0.160469	1	1	1	1		0	2.06143	2.06143	2.06143	2.06143	0.707724	0.707724	0	0	0	0.996654	0.996654	0.996654	0	0	0	0	0	0.996654	0.996654	0.996654	0	0	0	0	0.996654	0	0
mNN27_{molestus}	1	1	1	1	0.160469	1	0.160469	0.160469	0.160469	1	1	0.160469	1	1	0.160469	1	1	1	1	1		2.06143	2.06143	2.06143	2.06143	0.707724	0.707724	0	0	0	0.996654	0.996654	0.996654	0	0	0	0	0	0.996654	0.996654	0.996654	0	0	0	0	0.996654	0	0
cp219-2_{molestus}	0.0207108	0.0207108	0.0207108	0.0207108	0.033982	0.0207108	0.033982	0.033982	0.033982	0.0207108	0.0207108	0.033982	0.0207108	0.0207108	0.033982	0.0207108	0.0207108	0.0207108	0.0207108	0.0207108	0.0207108		0	0	0	2.49813	2.49813	2.06143	2.06143	2.06143	1.84186	1.84186	1.84186	2.06143	2.06143	2.06143	2.06143	2.06143	1.84186	1.84186	1.84186	2.06143	2.06143	2.06143	2.06143	1.84186	2.06143	2.06143
cp219-4_{molestus}	0.0207108	0.0207108	0.0207108	0.0207108	0.033982	0.0207108	0.033982	0.033982	0.033982	0.0207108	0.0207108	0.033982	0.0207108	0.0207108	0.033982	0.0207108	0.0207108	0.0207108	0.0207108	0.0207108	0.0207108	1		0	0	2.49813	2.49813	2.06143	2.06143	2.06143	1.84186	1.84186	1.84186	2.06143	2.06143	2.06143	2.06143	2.06143	1.84186	1.84186	1.84186	2.06143	2.06143	2.06143	2.06143	1.84186	2.06143	2.06143
cp219-10_{molestus}	0.0207108	0.0207108	0.0207108	0.0207108	0.033982	0.0207108	0.033982	0.033982	0.033982	0.0207108	0.0207108	0.033982	0.0207108	0.0207108	0.033982	0.0207108	0.0207108	0.0207108	0.0207108	0.0207108	0.0207108	1	1		0	2.49813	2.49813	2.06143	2.06143	2.06143	1.84186	1.84186	1.84186	2.06143	2.06143	2.06143	2.06143	2.06143	1.84186	1.84186	1.84186	2.06143	2.06143	2.06143	2.06143	1.84186	2.06143	2.06143
cp219-16_{molestus}	0.0207108	0.0207108	0.0207108	0.0207108	0.033982	0.0207108	0.033982	0.033982	0.033982	0.0207108	0.0207108	0.033982	0.0207108	0.0207108	0.033982	0.0207108	0.0207108	0.0207108	0.0207108	0.0207108	0.0207108	1	1	1		2.49813	2.49813	2.06143	2.06143	2.06143	1.84186	1.84186	1.84186	2.06143	2.06143	2.06143	2.06143	2.06143	1.84186	1.84186	1.84186	2.06143	2.06143	2.06143	2.06143	1.84186	2.06143	2.06143
cmNN23-5_{molestus}	0.240244	0.240244	0.240244	0.240244	0.148439	0.240244	0.148439	0.148439	0.148439	0.240244	0.240244	0.148439	0.240244	0.240244	0.148439	0.240244	0.240244	0.240244	0.240244	0.240244	0.240244	0.0069194	0.0069194	0.0069194	0.0069194		0	0.707724	0.707724	0.707724	1.04771	1.04771	1.04771	0.707724	0.707724	0.707724	0.707724	0.707724	1.04771	1.04771	1.04771	0.707724	0.707724	0.707724	0.707724	1.04771	0.707724	0.707724
cmNN23-6_{molestus}	0.240244	0.240244	0.240244	0.240244	0.148439	0.240244	0.148439	0.148439	0.148439	0.240244	0.240244	0.148439	0.240244	0.240244	0.148439	0.240244	0.240244	0.240244	0.240244	0.240244	0.240244	0.0069194	0.0069194	0.0069194	0.0069194	1		0.707724	0.707724	0.707724	1.04771	1.04771	1.04771	0.707724	0.707724	0.707724	0.707724	0.707724	1.04771	1.04771	1.04771	0.707724	0.707724	0.707724	0.707724	1.04771	0.707724	0.707724
cmNN23-1_{molestus}	1	1	1	1	0.160469	1	0.160469	0.160469	0.160469	1	1	0.160469	1	1	0.160469	1	1	1	1	1	1	0.0207108	0.0207108	0.0207108	0.0207108	0.240244	0.240244		0	0	0.996654	0.996654	0.996654	0	0	0	0	0	0.996654	0.996654	0.996654	0	0	0	0	0.996654	0	0
cmNN23-2_{molestus}	1	1	1	1	0.160469	1	0.160469	0.160469	0.160469	1	1	0.160469	1	1	0.160469	1	1	1	1	1	1	0.0207108	0.0207108	0.0207108	0.0207108	0.240244	0.240244	1		0	0.996654	0.996654	0.996654	0	0	0	0	0	0.996654	0.996654	0.996654	0	0	0	0	0.996654	0	0
cmNN23-3_{molestus}	1	1	1	1	0.160469	1	0.160469	0.160469	0.160469	1	1	0.160469	1	1	0.160469	1	1	1	1	1	1	0.0207108	0.0207108	0.0207108	0.0207108	0.240244	0.240244	1	1		0.996654	0.996654	0.996654	0	0	0	0	0	0.996654	0.996654	0.996654	0	0	0	0	0.996654	0	0
cm46-1_{molestus}	0.160469	0.160469	0.160469	0.160469	1	0.160469	1	1	1	0.160469	0.160469	1	0.160469	0.160469	1	0.160469	0.160469	0.160469	0.160469	0.160469	0.160469	0.033982	0.033982	0.033982	0.033982	0.148439	0.148439	0.160469	0.160469	0.160469		0	0	0.996654	0.996654	0.996654	0.996654	0.996654	0	0	0	0.996654	0.996654	0.996654	0.996654	0	0.996654	0.996654
cm46-4_{molestus}	0.160469	0.160469	0.160469	0.160469	1	0.160469	1	1	1	0.160469	0.160469	1	0.160469	0.160469	1	0.160469	0.160469	0.160469	0.160469	0.160469	0.160469	0.033982	0.033982	0.033982	0.033982	0.148439	0.148439	0.160469	0.160469	0.160469	1		0	0.996654	0.996654	0.996654	0.996654	0.996654	0	0	0	0.996654	0.996654	0.996654	0.996654	0	0.996654	0.996654
cm46-6_{molestus}	0.160469	0.160469	0.160469	0.160469	1	0.160469	1	1	1	0.160469	0.160469	1	0.160469	0.160469	1	0.160469	0.160469	0.160469	0.160469	0.160469	0.160469	0.033982	0.033982	0.033982	0.033982	0.148439	0.148439	0.160469	0.160469	0.160469	1	1		0.996654	0.996654	0.996654	0.996654	0.996654	0	0	0	0.996654	0.996654	0.996654	0.996654	0	0.996654	0.996654
cm109-1_{molestus}	1	1	1	1	0.160469	1	0.160469	0.160469	0.160469	1	1	0.160469	1	1	0.160469	1	1	1	1	1	1	0.0207108	0.0207108	0.0207108	0.0207108	0.240244	0.240244	1	1	1	0.160469	0.160469	0.160469		0	0	0	0	0.996654	0.996654	0.996654	0	0	0	0	0.996654	0	0
cm109-5_{molestus}	1	1	1	1	0.160469	1	0.160469	0.160469	0.160469	1	1	0.160469	1	1	0.160469	1	1	1	1	1	1	0.0207108	0.0207108	0.0207108	0.0207108	0.240244	0.240244	1	1	1	0.160469	0.160469	0.160469	1		0	0	0	0.996654	0.996654	0.996654	0	0	0	0	0.996654	0	0
cm109-6_{molestus}	1	1	1	1	0.160469	1	0.160469	0.160469	0.160469	1	1	0.160469	1	1	0.160469	1	1	1	1	1	1	0.0207108	0.0207108	0.0207108	0.0207108	0.240244	0.240244	1	1	1	0.160469	0.160469	0.160469	1	1		0	0	0.996654	0.996654	0.996654	0	0	0	0	0.996654	0	0
cp247-3_{molestus}	1	1	1	1	0.160469	1	0.160469	0.160469	0.160469	1	1	0.160469	1	1	0.160469	1	1	1	1	1	1	0.0207108	0.0207108	0.0207108	0.0207108	0.240244	0.240244	1	1	1	0.160469	0.160469	0.160469	1	1	1		0	0.996654	0.996654	0.996654	0	0	0	0	0.996654	0	0
cp247-5_{molestus}	1	1	1	1	0.160469	1	0.160469	0.160469	0.160469	1	1	0.160469	1	1	0.160469	1	1	1	1	1	1	0.0207108	0.0207108	0.0207108	0.0207108	0.240244	0.240244	1	1	1	0.160469	0.160469	0.160469	1	1	1	1		0.996654	0.996654	0.996654	0	0	0	0	0.996654	0	0
cm283-1_{molestus}	0.160469	0.160469	0.160469	0.160469	1	0.160469	1	1	1	0.160469	0.160469	1	0.160469	0.160469	1	0.160469	0.160469	0.160469	0.160469	0.160469	0.160469	0.033982	0.033982	0.033982	0.033982	0.148439	0.148439	0.160469	0.160469	0.160469	1	1	1	0.160469	0.160469	0.160469	0.160469	0.160469		0	0	0.996654	0.996654	0.996654	0.996654	0	0.996654	0.996654
cm283-3_{molestus}	0.160469	0.160469	0.160469	0.160469	1	0.160469	1	1	1	0.160469	0.160469	1	0.160469	0.160469	1	0.160469	0.160469	0.160469	0.160469	0.160469	0.160469	0.033982	0.033982	0.033982	0.033982	0.148439	0.148439	0.160469	0.160469	0.160469	1	1	1	0.160469	0.160469	0.160469	0.160469	0.160469	1		0	0.996654	0.996654	0.996654	0.996654	0	0.996654	0.996654
cm283-4_{molestus}	0.160469	0.160469	0.160469	0.160469	1	0.160469	1	1	1	0.160469	0.160469	1	0.160469	0.160469	1	0.160469	0.160469	0.160469	0.160469	0.160469	0.160469	0.033982	0.033982	0.033982	0.033982	0.148439	0.148439	0.160469	0.160469	0.160469	1	1	1	0.160469	0.160469	0.160469	0.160469	0.160469	1	1		0.996654	0.996654	0.996654	0.996654	0	0.996654	0.996654
mV42_{molestus}	1	1	1	1	0.160469	1	0.160469	0.160469	0.160469	1	1	0.160469	1	1	0.160469	1	1	1	1	1	1	0.0207108	0.0207108	0.0207108	0.0207108	0.240244	0.240244	1	1	1	0.160469	0.160469	0.160469	1	1	1	1	1	0.160469	0.160469	0.160469		0	0	0	0.996654	0	0
mV51_{molestus}	1	1	1	1	0.160469	1	0.160469	0.160469	0.160469	1	1	0.160469	1	1	0.160469	1	1	1	1	1	1	0.0207108	0.0207108	0.0207108	0.0207108	0.240244	0.240244	1	1	1	0.160469	0.160469	0.160469	1	1	1	1	1	0.160469	0.160469	0.160469	1		0	0	0.996654	0	0
mV52_{molestus}	1	1	1	1	0.160469	1	0.160469	0.160469	0.160469	1	1	0.160469	1	1	0.160469	1	1	1	1	1	1	0.0207108	0.0207108	0.0207108	0.0207108	0.240244	0.240244	1	1	1	0.160469	0.160469	0.160469	1	1	1	1	1	0.160469	0.160469	0.160469	1	1		0	0.996654	0	0
mV65_{molestus}	1	1	1	1	0.160469	1	0.160469	0.160469	0.160469	1	1	0.160469	1	1	0.160469	1	1	1	1	1	1	0.0207108	0.0207108	0.0207108	0.0207108	0.240244	0.240244	1	1	1	0.160469	0.160469	0.160469	1	1	1	1	1	0.160469	0.160469	0.160469	1	1	1		0.996654	0	0
mV70_{molestus}	0.160469	0.160469	0.160469	0.160469	1	0.160469	1	1	1	0.160469	0.160469	1	0.160469	0.160469	1	0.160469	0.160469	0.160469	0.160469	0.160469	0.160469	0.033982	0.033982	0.033982	0.033982	0.148439	0.148439	0.160469	0.160469	0.160469	1	1	1	0.160469	0.160469	0.160469	0.160469	0.160469	1	1	1	0.160469	0.160469	0.160469	0.160469		0.996654	0.996654
mV80_{molestus}	1	1	1	1	0.160469	1	0.160469	0.160469	0.160469	1	1	0.160469	1	1	0.160469	1	1	1	1	1	1	0.0207108	0.0207108	0.0207108	0.0207108	0.240244	0.240244	1	1	1	0.160469	0.160469	0.160469	1	1	1	1	1	0.160469	0.160469	0.160469	1	1	1	1	0.160469		0
mV83_{molestus}	1	1	1	1	0.160469	1	0.160469	0.160469	0.160469	1	1	0.160469	1	1	0.160469	1	1	1	1	1	1	0.0207108	0.0207108	0.0207108	0.0207108	0.240244	0.240244	1	1	1	0.160469	0.160469	0.160469	1	1	1	1	1	0.160469	0.160469	0.160469	1	1	1	1	0.160469	1
pipiens1-1_{pipiens}	0.0367063	0.0367063	0.0367063	0.0367063	0.0580406	0.0367063	0.0580406	0.0580406	0.0580406	0.0367063	0.0367063	0.0580406	0.0367063	0.0367063	0.0580406	0.0367063	0.0367063	0.0367063	0.0367063	0.0367063	0.0367063	0.0117345	0.0117345	0.0117345	0.0117345	0.0115915	0.0115915	0.0367063	0.0367063	0.0367063	0.0580406	0.0580406	0.0580406	0.0367063	0.0367063	0.0367063	0.0367063	0.0367063	0.0580406	0.0580406	0.0580406	0.0367063	0.0367063	0.0367063	0.0367063	0.0580406	0.0367063	0.0367063
pipiens1-2_{pipiens}	0.0367063	0.0367063	0.0367063	0.0367063	0.0580406	0.0367063	0.0580406	0.0580406	0.0580406	0.0367063	0.0367063	0.0580406	0.0367063	0.0367063	0.0580406	0.0367063	0.0367063	0.0367063	0.0367063	0.0367063	0.0367063	0.0117345	0.0117345	0.0117345	0.0117345	0.0115915	0.0115915	0.0367063	0.0367063	0.0367063	0.0580406	0.0580406	0.0580406	0.0367063	0.0367063	0.0367063	0.0367063	0.0367063	0.0580406	0.0580406	0.0580406	0.0367063	0.0367063	0.0367063	0.0367063	0.0580406	0.0367063	0.0367063
pipiens1-3_{pipiens}	0.0367063	0.0367063	0.0367063	0.0367063	0.0580406	0.0367063	0.0580406	0.0580406	0.0580406	0.0367063	0.0367063	0.0580406	0.0367063	0.0367063	0.0580406	0.0367063	0.0367063	0.0367063	0.0367063	0.0367063	0.0367063	0.0117345	0.0117345	0.0117345	0.0117345	0.0115915	0.0115915	0.0367063	0.0367063	0.0367063	0.0580406	0.0580406	0.0580406	0.0367063	0.0367063	0.0367063	0.0367063	0.0367063	0.0580406	0.0580406	0.0580406	0.0367063	0.0367063	0.0367063	0.0367063	0.0580406	0.0367063	0.0367063
pipiens2-1_{pipiens}	0.0128026	0.0128026	0.0128026	0.0128026	0.0196287	0.0128026	0.0196287	0.0196287	0.0196287	0.0128026	0.0128026	0.0196287	0.0128026	0.0128026	0.0196287	0.0128026	0.0128026	0.0128026	0.0128026	0.0128026	0.0128026	0.00442827	0.00442827	0.00442827	0.00442827	0.0043442	0.0043442	0.0128026	0.0128026	0.0128026	0.0196287	0.0196287	0.0196287	0.0128026	0.0128026	0.0128026	0.0128026	0.0128026	0.0196287	0.0196287	0.0196287	0.0128026	0.0128026	0.0128026	0.0128026	0.0196287	0.0128026	0.0128026
pipiens2-2_{pipiens}	0.0128026	0.0128026	0.0128026	0.0128026	0.0196287	0.0128026	0.0196287	0.0196287	0.0196287	0.0128026	0.0128026	0.0196287	0.0128026	0.0128026	0.0196287	0.0128026	0.0128026	0.0128026	0.0128026	0.0128026	0.0128026	0.00442827	0.00442827	0.00442827	0.00442827	0.0043442	0.0043442	0.0128026	0.0128026	0.0128026	0.0196287	0.0196287	0.0196287	0.0128026	0.0128026	0.0128026	0.0128026	0.0128026	0.0196287	0.0196287	0.0196287	0.0128026	0.0128026	0.0128026	0.0128026	0.0196287	0.0128026	0.0128026
pipiens2-3_{pipiens}	0.0296236	0.0296236	0.0296236	0.0296236	0.044908	0.0296236	0.044908	0.044908	0.044908	0.0296236	0.0296236	0.044908	0.0296236	0.0296236	0.044908	0.0296236	0.0296236	0.0296236	0.0296236	0.0296236	0.0296236	0.0100836	0.0100836	0.0100836	0.0100836	0.00988487	0.00988487	0.0296236	0.0296236	0.0296236	0.044908	0.044908	0.044908	0.0296236	0.0296236	0.0296236	0.0296236	0.0296236	0.044908	0.044908	0.044908	0.0296236	0.0296236	0.0296236	0.0296236	0.044908	0.0296236	0.0296236
pipiens3-1_{pipiens}	0.0128026	0.0128026	0.0128026	0.0128026	0.0196287	0.0128026	0.0196287	0.0196287	0.0196287	0.0128026	0.0128026	0.0196287	0.0128026	0.0128026	0.0196287	0.0128026	0.0128026	0.0128026	0.0128026	0.0128026	0.0128026	0.00442827	0.00442827	0.00442827	0.00442827	0.0043442	0.0043442	0.0128026	0.0128026	0.0128026	0.0196287	0.0196287	0.0196287	0.0128026	0.0128026	0.0128026	0.0128026	0.0128026	0.0196287	0.0196287	0.0196287	0.0128026	0.0128026	0.0128026	0.0128026	0.0196287	0.0128026	0.0128026
pipiens3-2_{pipiens}	0.0196287	0.0196287	0.0196287	0.0196287	0.0299449	0.0196287	0.0299449	0.0299449	0.0299449	0.0196287	0.0196287	0.0299449	0.0196287	0.0196287	0.0299449	0.0196287	0.0196287	0.0196287	0.0196287	0.0196287	0.0196287	0.00672488	0.00672488	0.00672488	0.00672488	0.00660194	0.00660194	0.0196287	0.0196287	0.0196287	0.0299449	0.0299449	0.0299449	0.0196287	0.0196287	0.0196287	0.0196287	0.0196287	0.0299449	0.0299449	0.0299449	0.0196287	0.0196287	0.0196287	0.0196287	0.0299449	0.0196287	0.0196287
pipiens3-3_{pipiens}	0.0196287	0.0196287	0.0196287	0.0196287	0.0299449	0.0196287	0.0299449	0.0299449	0.0299449	0.0196287	0.0196287	0.0299449	0.0196287	0.0196287	0.0299449	0.0196287	0.0196287	0.0196287	0.0196287	0.0196287	0.0196287	0.00672488	0.00672488	0.00672488	0.00672488	0.00660194	0.00660194	0.0196287	0.0196287	0.0196287	0.0299449	0.0299449	0.0299449	0.0196287	0.0196287	0.0196287	0.0196287	0.0196287	0.0299449	0.0299449	0.0299449	0.0196287	0.0196287	0.0196287	0.0196287	0.0299449	0.0196287	0.0196287
cp247-1_{pipiens}	0.0357316	0.0357316	0.0357316	0.0357316	0.0540756	0.0357316	0.0540756	0.0540756	0.0540756	0.0357316	0.0357316	0.0540756	0.0357316	0.0357316	0.0540756	0.0357316	0.0357316	0.0357316	0.0357316	0.0357316	0.0357316	0.0120848	0.0120848	0.0120848	0.0120848	0.0119244	0.0119244	0.0357316	0.0357316	0.0357316	0.0540756	0.0540756	0.0540756	0.0357316	0.0357316	0.0357316	0.0357316	0.0357316	0.0540756	0.0540756	0.0540756	0.0357316	0.0357316	0.0357316	0.0357316	0.0540756	0.0357316	0.0357316
cp247-2_{pipiens}	0.0357316	0.0357316	0.0357316	0.0357316	0.0540756	0.0357316	0.0540756	0.0540756	0.0540756	0.0357316	0.0357316	0.0540756	0.0357316	0.0357316	0.0540756	0.0357316	0.0357316	0.0357316	0.0357316	0.0357316	0.0357316	0.0120848	0.0120848	0.0120848	0.0120848	0.0119244	0.0119244	0.0357316	0.0357316	0.0357316	0.0540756	0.0540756	0.0540756	0.0357316	0.0357316	0.0357316	0.0357316	0.0357316	0.0540756	0.0540756	0.0540756	0.0357316	0.0357316	0.0357316	0.0357316	0.0540756	0.0357316	0.0357316
cm46-2_{pipiens}	0.00677973	0.00677973	0.00677973	0.00677973	0.0109432	0.00677973	0.0109432	0.0109432	0.0109432	0.00677973	0.00677973	0.0109432	0.0357316	0.0357316	0.0109432	0.00677973	0.00677973	0.00677973	0.00677973	0.00677973	0.00677973	0.000983305	0.000983305	0.000983305	0.000983305	0.00236225	0.00236225	0.00677973	0.00677973	0.00677973	0.0109432	0.0109432	0.0109432	0.00677973	0.00677973	0.00677973	0.00677973	0.00677973	0.0109432	0.0109432	0.0109432	0.00677973	0.00677973	0.00677973	0.00677973	0.0109432	0.00677973	0.00677973
cm109-2_{pipiens}	0.0467812	0.0467812	0.0467812	0.0467812	0.0758438	0.0467812	0.0758438	0.0758438	0.0758438	0.0467812	0.0467812	0.0758438	0.0357316	0.0357316	0.0758438	0.0467812	0.0467812	0.0467812	0.0467812	0.0467812	0.0467812	0.0147408	0.0147408	0.0147408	0.0147408	0.0145847	0.0145847	0.0467812	0.0467812	0.0467812	0.0758438	0.0758438	0.0758438	0.0467812	0.0467812	0.0467812	0.0467812	0.0467812	0.0758438	0.0758438	0.0758438	0.0467812	0.0467812	0.0467812	0.0467812	0.0758438	0.0467812	0.0467812
cm109-3_{pipiens}	0.0467812	0.0467812	0.0467812	0.0467812	0.0758438	0.0467812	0.0758438	0.0758438	0.0758438	0.0467812	0.0467812	0.0758438	0.0357316	0.0357316	0.0758438	0.0467812	0.0467812	0.0467812	0.0467812	0.0467812	0.0467812	0.0147408	0.0147408	0.0147408	0.0147408	0.0145847	0.0145847	0.0467812	0.0467812	0.0467812	0.0758438	0.0758438	0.0758438	0.0467812	0.0467812	0.0467812	0.0467812	0.0467812	0.0758438	0.0758438	0.0758438	0.0467812	0.0467812	0.0467812	0.0467812	0.0758438	0.0467812	0.0467812
cp219-1_{pipiens}	0.0106955	0.0106955	0.0106955	0.0106955	0.017125	0.0106955	0.017125	0.017125	0.017125	0.0106955	0.0106955	0.017125	0.0357316	0.0357316	0.017125	0.0106955	0.0106955	0.0106955	0.0106955	0.0106955	0.0106955	0.00364583	0.00364583	0.00364583	0.00364583	0.00363247	0.00363247	0.0106955	0.0106955	0.0106955	0.017125	0.017125	0.017125	0.0106955	0.0106955	0.0106955	0.0106955	0.0106955	0.017125	0.017125	0.017125	0.0106955	0.0106955	0.0106955	0.0106955	0.017125	0.0106955	0.0106955
cp219-3_{pipiens}	0.0106955	0.0106955	0.0106955	0.0106955	0.017125	0.0106955	0.017125	0.017125	0.017125	0.0106955	0.0106955	0.017125	0.0357316	0.0357316	0.017125	0.0106955	0.0106955	0.0106955	0.0106955	0.0106955	0.0106955	0.00364583	0.00364583	0.00364583	0.00364583	0.00363247	0.00363247	0.0106955	0.0106955	0.0106955	0.017125	0.017125	0.017125	0.0106955	0.0106955	0.0106955	0.0106955	0.0106955	0.017125	0.017125	0.017125	0.0106955	0.0106955	0.0106955	0.0106955	0.017125	0.0106955	0.0106955
cp219-7_{pipiens}	0.0106955	0.0106955	0.0106955	0.0106955	0.017125	0.0106955	0.017125	0.017125	0.017125	0.0106955	0.0106955	0.017125	0.0357316	0.0357316	0.017125	0.0106955	0.0106955	0.0106955	0.0106955	0.0106955	0.0106955	0.00364583	0.00364583	0.00364583	0.00364583	0.00363247	0.00363247	0.0106955	0.0106955	0.0106955	0.017125	0.017125	0.017125	0.0106955	0.0106955	0.0106955	0.0106955	0.0106955	0.017125	0.017125	0.017125	0.0106955	0.0106955	0.0106955	0.0106955	0.017125	0.0106955	0.0106955
cm283-2_{pipiens}	0.0177418	0.0177418	0.0177418	0.0177418	0.0288317	0.0177418	0.0288317	0.0288317	0.0288317	0.0177418	0.0177418	0.0288317	0.0357316	0.0357316	0.0288317	0.0177418	0.0177418	0.0177418	0.0177418	0.0177418	0.0177418	0.00594926	0.00594926	0.00594926	0.00594926	0.00588018	0.00588018	0.0177418	0.0177418	0.0177418	0.0288317	0.0288317	0.0288317	0.0177418	0.0177418	0.0177418	0.0177418	0.0177418	0.0288317	0.0288317	0.0288317	0.0177418	0.0177418	0.0177418	0.0177418	0.0288317	0.0177418	0.0177418
cm283-5_{pipiens}	0.0177418	0.0177418	0.0177418	0.0177418	0.0288317	0.0177418	0.0288317	0.0288317	0.0288317	0.0177418	0.0177418	0.0288317	0.0357316	0.0357316	0.0288317	0.0177418	0.0177418	0.0177418	0.0177418	0.0177418	0.0177418	0.00594926	0.00594926	0.00594926	0.00594926	0.00588018	0.00588018	0.0177418	0.0177418	0.0177418	0.0288317	0.0288317	0.0288317	0.0177418	0.0177418	0.0177418	0.0177418	0.0177418	0.0288317	0.0288317	0.0288317	0.0177418	0.0177418	0.0177418	0.0177418	0.0288317	0.0177418	0.0177418
pV196_{pipiens}	0.0166136	0.0166136	0.0166136	0.0166136	0.0254542	0.0166136	0.0254542	0.0254542	0.0254542	0.0166136	0.0166136	0.0254542	0.0357316	0.0357316	0.0254542	0.0166136	0.0166136	0.0166136	0.0166136	0.0166136	0.0166136	0.00575659	0.00575659	0.00575659	0.00575659	0.00565737	0.00565737	0.0166136	0.0166136	0.0166136	0.0254542	0.0254542	0.0254542	0.0166136	0.0166136	0.0166136	0.0166136	0.0166136	0.0254542	0.0254542	0.0254542	0.0166136	0.0166136	0.0166136	0.0166136	0.0254542	0.0166136	0.0166136
pIk3.4_{pipiens}	0.0339842	0.0339842	0.0339842	0.0339842	0.0567184	0.0339842	0.0567184	0.0567184	0.0567184	0.0339842	0.0339842	0.0567184	0.0357316	0.0357316	0.0567184	0.0339842	0.0339842	0.0339842	0.0339842	0.0339842	0.0339842	0.0107115	0.0107115	0.0107115	0.0107115	0.0106396	0.0106396	0.0339842	0.0339842	0.0339842	0.0567184	0.0567184	0.0567184	0.0339842	0.0339842	0.0339842	0.0339842	0.0339842	0.0567184	0.0567184	0.0567184	0.0339842	0.0339842	0.0339842	0.0339842	0.0567184	0.0339842	0.0339842
pV13_{pipiens}	0.0116262	0.0116262	0.0116262	0.0116262	0.0180166	0.0116262	0.0180166	0.0180166	0.0180166	0.0116262	0.0116262	0.0180166	0.0357316	0.0357316	0.0180166	0.0116262	0.0116262	0.0116262	0.0116262	0.0116262	0.0116262	0.0040508	0.0040508	0.0040508	0.0040508	0.00398913	0.00398913	0.0116262	0.0116262	0.0116262	0.0180166	0.0180166	0.0180166	0.0116262	0.0116262	0.0116262	0.0116262	0.0116262	0.0180166	0.0180166	0.0180166	0.0116262	0.0116262	0.0116262	0.0116262	0.0180166	0.0116262	0.0116262
pV14_{pipiens}	0.0180166	0.0180166	0.0180166	0.0180166	0.0277599	0.0180166	0.0277599	0.0277599	0.0277599	0.0180166	0.0180166	0.0277599	0.0357316	0.0357316	0.0277599	0.0180166	0.0180166	0.0180166	0.0180166	0.0180166	0.0180166	0.00618612	0.00618612	0.00618612	0.00618612	0.00610368	0.00610368	0.0180166	0.0180166	0.0180166	0.0277599	0.0277599	0.0277599	0.0180166	0.0180166	0.0180166	0.0180166	0.0180166	0.0277599	0.0277599	0.0277599	0.0180166	0.0180166	0.0180166	0.0180166	0.0277599	0.0180166	0.0180166
pV15_{pipiens}	0.0271424	0.0271424	0.0271424	0.0271424	0.0434665	0.0271424	0.0434665	0.0434665	0.0434665	0.0271424	0.0271424	0.0434665	0.0357316	0.0357316	0.0434665	0.0271424	0.0271424	0.0271424	0.0271424	0.0271424	0.0271424	0.00884357	0.00884357	0.00884357	0.00884357	0.00872967	0.00872967	0.0271424	0.0271424	0.0271424	0.0434665	0.0434665	0.0434665	0.0271424	0.0271424	0.0271424	0.0271424	0.0271424	0.0434665	0.0434665	0.0434665	0.0271424	0.0271424	0.0271424	0.0271424	0.0434665	0.0271424	0.0271424
pV189_{pipiens}	0.0128026	0.0128026	0.0128026	0.0128026	0.0196287	0.0128026	0.0196287	0.0196287	0.0196287	0.0128026	0.0128026	0.0196287	0.0357316	0.0357316	0.0196287	0.0128026	0.0128026	0.0128026	0.0128026	0.0128026	0.0128026	0.00442827	0.00442827	0.00442827	0.00442827	0.0043442	0.0043442	0.0128026	0.0128026	0.0128026	0.0196287	0.0196287	0.0196287	0.0128026	0.0128026	0.0128026	0.0128026	0.0128026	0.0196287	0.0196287	0.0196287	0.0128026	0.0128026	0.0128026	0.0128026	0.0196287	0.0128026	0.0128026
pV20_{pipiens}	0.0125798	0.0125798	0.0125798	0.0125798	0.018836	0.0125798	0.018836	0.018836	0.018836	0.0125798	0.0125798	0.018836	0.0357316	0.0357316	0.018836	0.0125798	0.0125798	0.0125798	0.0125798	0.0125798	0.0125798	0.00452384	0.00452384	0.00452384	0.00452384	0.00442124	0.00442124	0.0125798	0.0125798	0.0125798	0.018836	0.018836	0.018836	0.0125798	0.0125798	0.0125798	0.0125798	0.0125798	0.018836	0.018836	0.018836	0.0125798	0.0125798	0.0125798	0.0125798	0.018836	0.0125798	0.0125798
pIk3.17_{pipiens}	0.00953777	0.00953777	0.00953777	0.00953777	0.0153082	0.00953777	0.0153082	0.0153082	0.0153082	0.00953777	0.00953777	0.0153082	0.0357316	0.0357316	0.0153082	0.00953777	0.00953777	0.00953777	0.00953777	0.00953777	0.00953777	0.00327594	0.00327594	0.00327594	0.00327594	0.00323658	0.00323658	0.00953777	0.00953777	0.00953777	0.0153082	0.0153082	0.0153082	0.00953777	0.00953777	0.00953777	0.00953777	0.00953777	0.0153082	0.0153082	0.0153082	0.00953777	0.00953777	0.00953777	0.00953777	0.0153082	0.00953777	0.00953777
pV180_{pipiens}	0.0591637	0.0591637	0.0591637	0.0591637	0.102881	0.0591637	0.102881	0.102881	0.102881	0.0591637	0.0591637	0.102881	0.0591637	0.0591637	0.102881	0.0591637	0.0591637	0.0591637	0.0591637	0.0591637	0.0591637	0.0180281	0.0180281	0.0180281	0.0180281	0.0179022	0.0179022	0.0591637	0.0591637	0.0591637	0.102881	0.102881	0.102881	0.0591637	0.0591637	0.0591637	0.0591637	0.0591637	0.102881	0.102881	0.102881	0.0591637	0.0591637	0.0591637	0.0591637	0.102881	0.0591637	0.0591637
pV202_{pipiens}	0.0178443	0.0178443	0.0178443	0.0178443	0.0289598	0.0178443	0.0289598	0.0289598	0.0289598	0.0178443	0.0178443	0.0289598	0.0178443	0.0178443	0.0289598	0.0178443	0.0178443	0.0178443	0.0178443	0.0178443	0.0178443	0.00602394	0.00602394	0.00602394	0.00602394	0.00595709	0.00595709	0.0178443	0.0178443	0.0178443	0.0289598	0.0289598	0.0289598	0.0178443	0.0178443	0.0178443	0.0178443	0.0178443	0.0289598	0.0289598	0.0289598	0.0178443	0.0178443	0.0178443	0.0178443	0.0289598	0.0178443	0.0178443
pV16_{pipiens}	0.00677973	0.00677973	0.00677973	0.00677973	0.0109432	0.00677973	0.0109432	0.0109432	0.0109432	0.00677973	0.00677973	0.0109432	0.00677973	0.00677973	0.0109432	0.00677973	0.00677973	0.00677973	0.00677973	0.00677973	0.00677973	0.000983305	0.000983305	0.000983305	0.000983305	0.00236225	0.00236225	0.00677973	0.00677973	0.00677973	0.0109432	0.0109432	0.0109432	0.00677973	0.00677973	0.00677973	0.00677973	0.00677973	0.0109432	0.0109432	0.0109432	0.00677973	0.00677973	0.00677973	0.00677973	0.0109432	0.00677973	0.00677973
pV12_{pipiens}	0.0461146	0.0461146	0.0461146	0.0461146	0.0708285	0.0461146	0.0708285	0.0708285	0.0708285	0.0461146	0.0461146	0.0708285	0.0461146	0.0461146	0.0708285	0.0461146	0.0461146	0.0461146	0.0461146	0.0461146	0.0461146	0.0152471	0.0152471	0.0152471	0.0152471	0.0150158	0.0150158	0.0461146	0.0461146	0.0461146	0.0708285	0.0708285	0.0708285	0.0461146	0.0461146	0.0461146	0.0461146	0.0461146	0.0708285	0.0708285	0.0708285	0.0461146	0.0461146	0.0461146	0.0461146	0.0708285	0.0461146	0.0461146

## Sheet: Caption
Table. Codon-based Test of Purifying Selection for analysis between sequences.
The probability of rejecting the null hypothesis of strict-neutrality (dN = dS) in favor of the alternative hypothesis (dN < dS) (below diagonal) is shown. Values of P less than 0.05 are considered significant at the 5% level and are highlighted. The test statistic (dS - dN) is shown above the diagonal. dS and dN are the numbers of synonymous and nonsynonymous substitutions per site, respectively…
1. Nei M. and Kumar S. (2000). Molecular Evolution and Phylogenetics. Oxford University Press, New York.
2. Tamura K., Stecher G., Peterson D., Filipski A., and Kumar S. (2013). MEGA6: Molecular Evolutionary Genetics Analysis version 6.0. Molecular Biology and Evolution30: 2725-2729.
Disclaimer: Although utmost care has been taken to ensure the correctness of the caption, the caption text is provided "as is" without any warranty of any kind. Authors advise the user to carefully check the caption prior to its use for any purpose and report any errors or problems to the authors immediately (www.megasoftware.net). In no event shall the authors and their employers be liable for a…
